# Supplementary material for: The small RNA SgrS controls sugar–phosphate accumulation by regulating multiple PTS genes
Source: PubMed Central journal article supplement — Nucleic Acids Res. 2011 Jan 17;39(9):3806–19. doi: 10.1093/nar/gkq1219 (PMC3089445; doi:10.1093/nar/gkq1219), 2011-01-17
Supplement: supp_gkq1219_Rice_Vanderpool_Supp_Rev2.pdf [file supp_gkq1219_Rice_Vanderpool_Supp_Rev2.pdf]

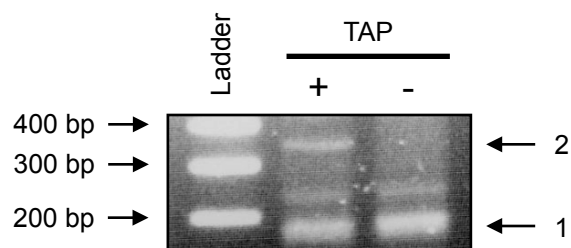

**Figure S1. *manYZ* contains a monophosphorylated 5' end indicative of a processing event.** Total RNA extracted from wild-type (DJ480) cells was treated with Tobacco Acid Pyrophosphatase (TAP) and ligated to a synthetic RNA adapter. A *manY*-specific band (band 1) was present at approximately equivalent levels in both TAP-treated and untreated samples, indicating the *manY* species contains a monophosphorylated end. Band 2 was also gel extracted and sequenced but was a non-specific PCR product.

Figure S1

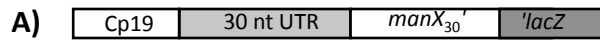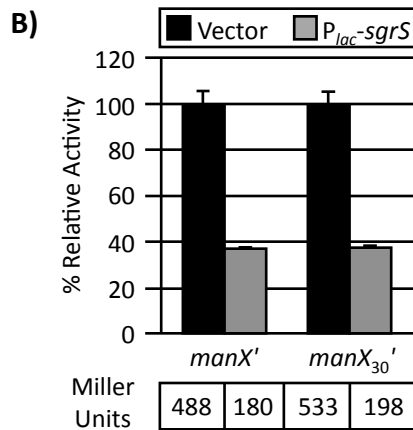

**Figure S2. The 5' UTR of *manX* is not required for regulation by SgrS.** A) A chromosomal *lacZ* translational fusion was constructed at the native locus. The native promoter of *manX* was replaced with the constitutive Cp19 promoter (27)30 nt upstream of the *manX* start codon, thereby deleting 85 nt of the *manX* 5' UTR (*manX*'<sub>30'</sub>-*'lacZ*). B) Cp19-*manX*'<sub>30'</sub>-*'lacZ* (JH175) and *manX*<sub>30'</sub>-*'lacZ* (JH181) strains (Fig. 1A) carrying an empty vector or P<sub>*lac*</sub>-*sgrS* were analyzed for β-galactosidase as described in Fig. 1C.

Figure S2

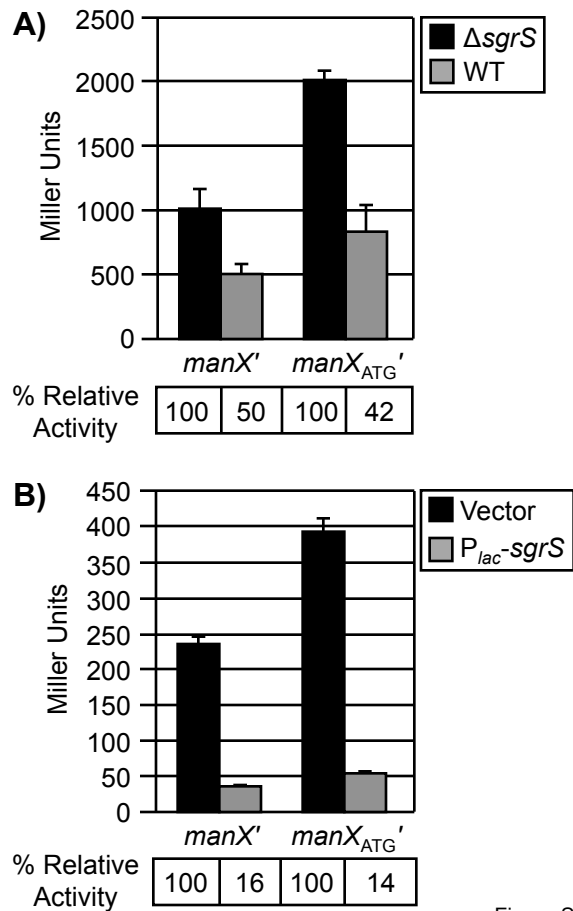

Figure S3

**Figure S3. The *manX* start codon does not influence regulation by SgrS.** A) *manX'*-*lacZ* strains were  $\Delta$ *sgrS* (JH115) or *sgrS*<sup>+</sup> (JH114). These were compared to  $\Delta$ *sgrS* (JH244) or *sgrS*<sup>+</sup> (JH241) *manX<sub>ATG</sub>'*-*lacZ* strains.  $\beta$ -galactosidase assays were performed and data normalized as described in Fig. 1B. B) A *manX'*-*lacZ* strain (JH116) carrying an empty vector or *P<sub>lac</sub>-sgrS* was compared to a *manX<sub>ATG</sub>'*-*lacZ* (JH244) also carrying an empty vector or *P<sub>lac</sub>-sgrS*. Assays were performed as described in Fig. 1C.
